# Supplementary material for: An Acute Injury Model for the Phenotypic Characteristics of Geographic Atrophy
Source: PubMed Central journal article supplement — Invest Ophthalmol Vis Sci. 2018 Jul;59(4):AMD143–51. doi: 10.1167/iovs.18-24245 (PMC6133234; doi:10.1167/iovs.18-24245), 2018-07
Supplement: iovs-59-04-16_s01.pdf [file iovs-59-04-16_s01.pdf]

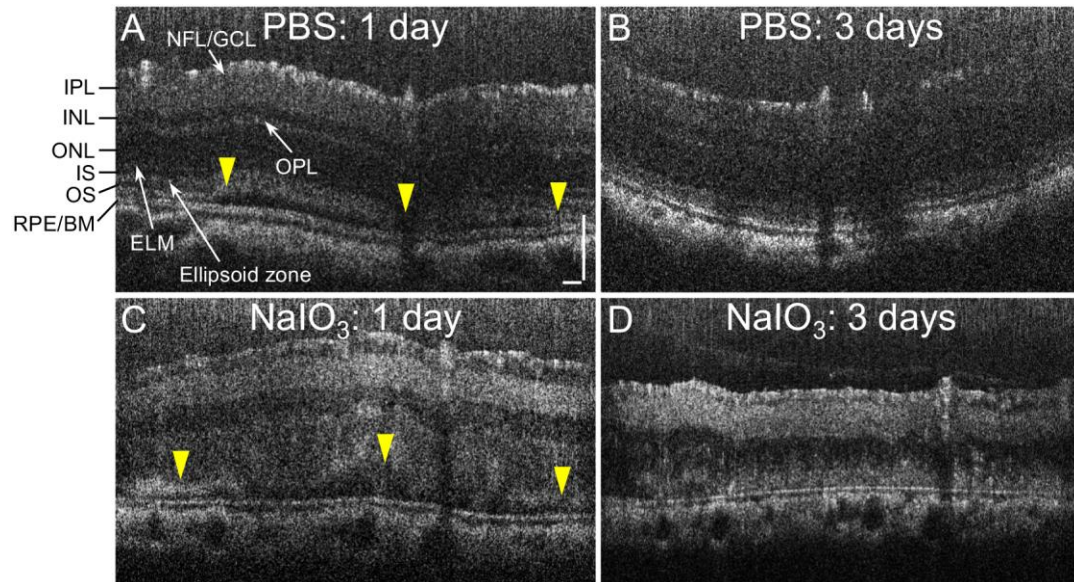

Supplementary Figure 1. Representative OCT scans at one (A, C) and three (B, D) days post-injection of 1  $\mu\text{L}$  of PBS (A,B) and  $\text{NaIO}_3$  (C,D). A small elevation of the retina is confirmed at day one (yellow arrowhead) but disappears at day three. Scale bars indicate 100  $\mu\text{m}$ . (NFL; nerve fiber layer, GCL; ganglion cell layer, IPL; inner plexiform layer, INL; inner nuclear layer, OPL; outer plexiform layer, ONL; outer nuclear layer, IS; inner segment, ELM; external limiting membrane, OS; outer segment, BM; Bruch's membrane)
